# Supplementary material for: SAMP-Score: a morphology-based machine learning classification method for screening pro-senescence compounds in p16 positive cancer cells
Source: Aging (Albany NY). 2025 Oct 30;17(11):2688–716. doi: 10.18632/aging.206333 (PMC12822720; doi:10.18632/aging.206333)
Supplement: Supplementary Table 1 [file aging-17-11-206333-s002.xlsx]

## Sheet: Supplementary Table 1
Supplementary Table 1. Compound designation list.
DDDNumber	QMCODE
DDD01052604	QM0000001
DDD01041531	QM0000002
DDD01052611	QM0000003
DDD01052619	QM0000005
DDD01041545	QM0000006
DDD01052625	QM0000007
DDD00093646	QM0000008
DDD01052633	QM0000009
DDD01041558	QM0000010
DDD01052640	QM0000011
DDD01041566	QM0000012
DDD00068594	QM0000013
DDD00711645	QM0000014
DDD01052653	QM0000015
DDD01052660	QM0000016
DDD01041580	QM0000017
DDD01052668	QM0000018
DDD01041589	QM0000019
DDD01052676	QM0000020
DDD00320639	QM0000021
LowControl	LowControl
HighControl	HighControl
DDD01293138	QM0000024
DDD01243053	QM0000025
DDD01293143	QM0000026
DDD01242593	QM0000027
DDD01293149	QM0000028
DDD01242641	QM0000029
DDD01293152	QM0000030
DDD01242578	QM0000031
DDD00362228	QM0000032
DDD01242658	QM0000033
DDD01293162	QM0000034
DDD01242783	QM0000035
DDD01293170	QM0000036
DDD01242823	QM0000037
DDD01293176	QM0000038
DDD01242929	QM0000039
DDD01293183	QM0000040
DDD01243083	QM0000041
DDD01293191	QM0000042
DDD01243216	QM0000043
DDD01293198	QM0000044
DDD01243340	QM0000045
LowControl	LowControl
HighControl	HighControl
DDD01052605	QM0000046
DDD01041532	QM0000047
DDD01052612	QM0000048
DDD01041539	QM0000049
DDD00018360	QM0000050
DDD01041546	QM0000051
DDD01052626	QM0000052
DDD01041553	QM0000053
DDD01052634	QM0000054
DDD01041559	QM0000055
DDD01052641	QM0000056
DDD00305382	QM0000057
DDD00067241	QM0000058
DDD00322206	QM0000059
DDD01052654	QM0000060
DDD01052661	QM0000061
DDD01041581	QM0000062
DDD01052669	QM0000063
DDD01041590	QM0000064
DDD01052677	QM0000065
LowControl	LowControl
HighControl	HighControl
DDD01243051	QM0000066
DDD01293144	QM0000067
DDD01242758	QM0000068
DDD00550801	QM0000069
DDD01242699	QM0000070
DDD01293153	QM0000071
DDD01242498	QM0000072
DDD00014127	QM0000073
DDD01242736	QM0000074
DDD01293163	QM0000075
DDD01242610	QM0000076
DDD01293171	QM0000077
DDD00091672	QM0000078
DDD01293177	QM0000079
DDD00034859	QM0000080
DDD01293184	QM0000081
DDD01243171	QM0000082
DDD01293192	QM0000083
DDD01243226	QM0000084
DDD01293199	QM0000085
DDD01243352	QM0000086
LowControl	LowControl
HighControl	HighControl
DDD01052606	QM0000087
DDD01041533	QM0000088
DDD01052613	QM0000089
DDD01041540	QM0000090
DDD01052620	QM0000091
DDD01041547	QM0000092
DDD01052627	QM0000093
DDD01041554	QM0000094
DDD01052635	QM0000095
DDD01041560	QM0000096
DDD01052642	QM0000097
DDD01041567	QM0000098
DDD00068848	QM0000099
DDD00301553	QM0000100
DDD01052655	QM0000101
DDD01041576	QM0000102
DDD01052662	QM0000103
DDD01041582	QM0000104
DDD01052670	QM0000105
DDD01041591	QM0000106
DDD01052678	QM0000107
LowControl	LowControl
HighControl	HighControl
DDD00562632	QM0000108
DDD01242767	QM0000109
DDD00047033	QM0000110
DDD01242889	QM0000111
DDD00763821	QM0000112
DDD01242989	QM0000113
DDD01293154	QM0000114
DDD01242633	QM0000115
DDD01293156	QM0000116
DDD01242838	QM0000117
DDD01293164	QM0000118
DDD01242666	QM0000119
DDD00418042	QM0000120
DDD00003071	QM0000121
DDD00364076	QM0000122
DDD01242951	QM0000123
DDD01293185	QM0000124
DDD01243179	QM0000125
DDD01293193	QM0000126
DDD01243235	QM0000127
DDD01293200	QM0000128
DDD01243358	QM0000129
LowControl	LowControl
HighControl	HighControl
DDD01052607	QM0000130
DDD01052614	QM0000131
DDD01041541	QM0000132
DDD01052621	QM0000133
DDD01041548	QM0000134
DDD01052628	QM0000135
DDD00045547	QM0000136
DDD01052636	QM0000137
DDD01041561	QM0000138
DDD01052643	QM0000139
DDD00288462	QM0000140
DDD01052648	QM0000141
DDD00711738	QM0000142
DDD01052656	QM0000143
DDD00082242	QM0000144
DDD01052663	QM0000145
DDD01041583	QM0000146
DDD01052671	QM0000147
DDD01041592	QM0000148
LowControl	LowControl
HighControl	HighControl
DDD01293140	QM0000149
DDD01242628	QM0000150
DDD01293145	QM0000151
DDD01242831	QM0000152
DDD01293150	QM0000153
DDD01242857	QM0000154
DDD00271373	QM0000155
DDD01242590	QM0000156
DDD01293157	QM0000157
DDD01242572	QM0000158
DDD01293165	QM0000159
DDD01242609	QM0000160
DDD01293172	QM0000161
DDD01242849	QM0000162
DDD01293178	QM0000163
DDD01242997	QM0000164
DDD01293186	QM0000165
DDD01243184	QM0000166
DDD00077918	QM0000167
DDD01243256	QM0000168
DDD01293201	QM0000169
DDD01243362	QM0000170
LowControl	LowControl
HighControl	HighControl
DDD00003753	QM0000171
DDD01041535	QM0000172
DDD01052615	QM0000173
DDD01041542	QM0000174
DDD01052622	QM0000175
DDD01041549	QM0000176
DDD01052629	QM0000177
DDD01041555	QM0000178
DDD01052637	QM0000179
DDD01041562	QM0000180
DDD01052644	QM0000181
DDD01041568	QM0000182
DDD01052649	QM0000183
DDD00711804	QM0000184
DDD00015371	QM0000185
DDD00054699	QM0000186
DDD01052664	QM0000187
DDD01041584	QM0000188
DDD01052672	QM0000189
DDD01041593	QM0000190
LowControl	LowControl
HighControl	HighControl
DDD00328186	QM0000191
DDD01242913	QM0000192
DDD01293146	QM0000193
DDD01243004	QM0000194
DDD00244315	QM0000195
DDD01242587	QM0000196
DDD00274360	QM0000197
DDD01243438	QM0000198
DDD01293158	QM0000199
DDD01242571	QM0000200
DDD01293166	QM0000201
DDD01242627	QM0000202
DDD01293173	QM0000203
DDD00323610	QM0000204
DDD01293179	QM0000205
DDD01243017	QM0000206
DDD01293187	QM0000207
DDD01243191	QM0000208
DDD01293194	QM0000209
DDD01243271	QM0000210
DDD00364104	QM0000211
DDD00710020	QM0000212
LowControl	LowControl
HighControl	HighControl
DDD01052608	QM0000213
DDD01041536	QM0000214
DDD01052616	QM0000215
DDD01041543	QM0000216
DDD01052623	QM0000217
DDD01041550	QM0000218
DDD01052630	QM0000219
DDD01041556	QM0000220
DDD01052638	QM0000221
DDD01041563	QM0000222
DDD01052645	QM0000223
DDD01041569	QM0000224
DDD01052650	QM0000225
DDD01041572	QM0000226
DDD01052657	QM0000227
DDD01041577	QM0000228
DDD01052665	QM0000229
DDD01041585	QM0000230
DDD01052673	QM0000231
LowControl	LowControl
HighControl	HighControl
DDD00042177	QM0000232
DDD01243468	QM0000233
DDD00758322	QM0000234
DDD01242596	QM0000235
DDD01293151	QM0000236
DDD01243361	QM0000237
DDD00272215	QM0000238
DDD01243153	QM0000239
DDD01293159	QM0000240
DDD00073017	QM0000241
DDD01293167	QM0000242
DDD01242770	QM0000243
DDD01293174	QM0000244
DDD01242894	QM0000245
DDD01293180	QM0000246
DDD01243026	QM0000247
DDD01293188	QM0000248
DDD01243194	QM0000249
DDD01293195	QM0000250
DDD01243274	QM0000251
DDD01243420	QM0000252
LowControl	LowControl
HighControl	HighControl
DDD01052609	QM0000253
DDD01041537	QM0000254
DDD01052617	QM0000255
DDD00303293	QM0000256
DDD00009848	QM0000257
DDD01041551	QM0000258
DDD01052631	QM0000259
DDD01041557	QM0000260
DDD00012103	QM0000261
DDD01041564	QM0000262
DDD01052646	QM0000263
DDD01041570	QM0000264
DDD01052651	QM0000265
DDD01052658	QM0000266
DDD01041578	QM0000267
DDD01052666	QM0000268
DDD01041586	QM0000269
DDD01052674	QM0000270
LowControl	LowControl
HighControl	HighControl
DDD01293141	QM0000271
DDD01242672	QM0000272
DDD01293147	QM0000273
DDD01243141	QM0000274
DDD00240406	QM0000275
DDD01243447	QM0000276
DDD01293155	QM0000277
DDD01242759	QM0000278
DDD01293160	QM0000279
DDD01243128	QM0000280
DDD01293168	QM0000281
DDD01242798	QM0000282
DDD00410447	QM0000283
DDD01242908	QM0000284
DDD01293181	QM0000285
DDD01243028	QM0000286
DDD01293189	QM0000287
DDD01243197	QM0000288
DDD01293196	QM0000289
DDD01243275	QM0000290
DDD01243436	QM0000291
LowControl	LowControl
HighControl	HighControl
DDD01052610	QM0000292
DDD00036412	QM0000293
DDD01052618	QM0000294
DDD01041544	QM0000295
DDD01052624	QM0000296
DDD01041552	QM0000297
DDD01052632	QM0000298
DDD00004291	QM0000299
DDD01052639	QM0000300
DDD01041565	QM0000301
DDD01052647	QM0000302
DDD01041571	QM0000303
DDD01052652	QM0000304
DDD01052659	QM0000305
DDD01041579	QM0000306
DDD01052667	QM0000307
DDD01041587	QM0000308
DDD01052675	QM0000309
DDD01041596	QM0000310
LowControl	LowControl
HighControl	HighControl
DDD01293142	QM0000311
DDD01242569	QM0000312
DDD01293148	QM0000313
DDD01243062	QM0000314
DDD00252329	QM0000315
DDD01243010	QM0000316
DDD00276648	QM0000317
DDD01242852	QM0000318
DDD01293161	QM0000319
DDD01242914	QM0000320
DDD01293169	QM0000321
DDD01242822	QM0000322
DDD01293175	QM0000323
DDD01242910	QM0000324
DDD01293182	QM0000325
DDD00040569	QM0000326
DDD01293190	QM0000327
DDD01243202	QM0000328
DDD01293197	QM0000329
DDD00010428	QM0000330
LowControl	LowControl
HighControl	HighControl
DDD01049281	QM0000331
DDD01052390	QM0000332
DDD01049319	QM0000333
DDD01052398	QM0000334
DDD01049374	QM0000335
DDD01052404	QM0000336
DDD01049419	QM0000337
DDD01052409	QM0000338
DDD01049472	QM0000339
DDD01052417	QM0000340
DDD01049552	QM0000341
DDD01052425	QM0000342
DDD01049585	QM0000343
DDD01052431	QM0000344
DDD01049640	QM0000345
DDD00050747	QM0000346
DDD01049694	QM0000347
DDD01052446	QM0000348
DDD01049730	QM0000349
DDD01052450	QM0000350
DDD01049831	QM0000351
DDD01052455	QM0000352
LowControl	LowControl
HighControl	HighControl
DDD01291328	QM0000353
DDD01243140	QM0000354
DDD00370751	QM0000355
DDD01242665	QM0000356
DDD01291335	QM0000357
DDD01242696	QM0000358
DDD01291343	QM0000359
DDD01242963	QM0000360
DDD01291349	QM0000361
DDD01243443	QM0000362
DDD01291357	QM0000363
DDD01242978	QM0000364
DDD01291363	QM0000365
DDD00729125	QM0000366
DDD01291371	QM0000367
DDD01242900	QM0000368
DDD01291379	QM0000369
DDD00016471	QM0000370
DDD00544783	QM0000371
DDD01243394	QM0000372
DDD01291393	QM0000373
LowControl	LowControl
HighControl	HighControl
DDD01049282	QM0000374
DDD01052391	QM0000375
DDD01049332	QM0000376
DDD01052399	QM0000377
DDD01049377	QM0000378
DDD00019090	QM0000379
DDD01049420	QM0000380
DDD01052410	QM0000381
DDD01049473	QM0000382
DDD01052418	QM0000383
DDD01049561	QM0000384
DDD01052426	QM0000385
DDD01049586	QM0000386
DDD01052432	QM0000387
DDD01049641	QM0000388
DDD01052439	QM0000389
DDD01049700	QM0000390
DDD00014634	QM0000391
DDD01049776	QM0000392
DDD01052451	QM0000393
DDD01049836	QM0000394
DDD01052456	QM0000395
LowControl	LowControl
HighControl	HighControl
DDD01291329	QM0000396
DDD01243117	QM0000397
DDD00507574	QM0000398
DDD01242789	QM0000399
DDD01291336	QM0000400
DDD01242719	QM0000401
DDD00391087	QM0000402
DDD01243466	QM0000403
DDD01291350	QM0000404
DDD01243046	QM0000405
DDD01291358	QM0000406
DDD01243118	QM0000407
DDD01291364	QM0000408
DDD01242786	QM0000409
DDD01291372	QM0000410
DDD01242917	QM0000411
DDD01291380	QM0000412
DDD01243288	QM0000413
DDD00543665	QM0000414
DDD01243422	QM0000415
DDD01291394	QM0000416
LowControl	LowControl
HighControl	HighControl
DDD01049300	QM0000417
DDD01052392	QM0000418
DDD01049334	QM0000419
DDD01052400	QM0000420
DDD01049382	QM0000421
DDD00075769	QM0000422
DDD01049425	QM0000423
DDD01052411	QM0000424
DDD01049475	QM0000425
DDD01052419	QM0000426
DDD01049563	QM0000427
DDD01052427	QM0000428
DDD01049587	QM0000429
DDD01052433	QM0000430
DDD01049643	QM0000431
DDD01052440	QM0000432
DDD01049701	QM0000433
DDD00015612	QM0000434
DDD01049779	QM0000435
DDD00069393	QM0000436
DDD01049837	QM0000437
DDD01052457	QM0000438
LowControl	LowControl
HighControl	HighControl
DDD01291330	QM0000439
DDD01242920	QM0000440
DDD00552998	QM0000441
DDD01243442	QM0000442
DDD01291337	QM0000443
DDD01242524	QM0000444
DDD01291344	QM0000445
DDD01243146	QM0000446
DDD01291351	QM0000447
DDD01242837	QM0000448
DDD01291359	QM0000449
DDD01243125	QM0000450
DDD01291365	QM0000451
DDD01242841	QM0000452
DDD01291373	QM0000453
DDD01242925	QM0000454
DDD01291381	QM0000455
DDD01243313	QM0000456
DDD01291387	QM0000457
DDD01243424	QM0000458
DDD01291395	QM0000459
LowControl	LowControl
HighControl	HighControl
DDD01049302	QM0000460
DDD01052393	QM0000461
DDD01049365	QM0000462
DDD00018132	QM0000463
DDD01049383	QM0000464
DDD00075803	QM0000465
DDD01049426	QM0000466
DDD01052412	QM0000467
DDD01049476	QM0000468
DDD01052420	QM0000469
DDD01049577	QM0000470
DDD00009316	QM0000471
DDD01049588	QM0000472
DDD01052434	QM0000473
DDD01049644	QM0000474
DDD01052441	QM0000475
DDD01049710	QM0000476
DDD00069991	QM0000477
DDD01049806	QM0000478
DDD00070119	QM0000479
DDD01049838	QM0000480
LowControl	LowControl
HighControl	HighControl
DDD00501364	QM0000481
DDD01242760	QM0000482
DDD01291332	QM0000483
DDD01243152	QM0000484
DDD01291338	QM0000485
DDD01243058	QM0000486
DDD01291345	QM0000487
DDD01243073	QM0000488
DDD01291352	QM0000489
DDD01242995	QM0000490
DDD01291360	QM0000491
DDD01242764	QM0000492
DDD01291366	QM0000493
DDD01242842	QM0000494
DDD01291374	QM0000495
DDD01242943	QM0000496
DDD01291382	QM0000497
DDD01243318	QM0000498
DDD01291388	QM0000499
DDD01243428	QM0000500
DDD01291396	QM0000501
LowControl	LowControl
HighControl	HighControl
DDD01049303	QM0000502
DDD01052394	QM0000503
DDD01049366	QM0000504
DDD01052401	QM0000505
DDD01049398	QM0000506
DDD01052405	QM0000507
DDD01049428	QM0000508
DDD01052413	QM0000509
DDD00957282	QM0000510
DDD01052421	QM0000511
DDD01049578	QM0000512
DDD00010277	QM0000513
DDD01049611	QM0000514
DDD01052435	QM0000515
DDD01049645	QM0000516
DDD01052442	QM0000517
DDD01049711	QM0000518
DDD01052447	QM0000519
DDD01049807	QM0000520
DDD01052452	QM0000521
DDD01049865	QM0000522
LowControl	LowControl
HighControl	HighControl
DDD01291331	QM0000523
DDD01242520	QM0000524
DDD01291333	QM0000525
DDD01242522	QM0000526
DDD01291339	QM0000527
DDD01242597	QM0000528
DDD00340468	QM0000529
DDD01242640	QM0000530
DDD01291353	QM0000531
DDD01243110	QM0000532
DDD00408967	QM0000533
DDD01242561	QM0000534
DDD01291367	QM0000535
DDD01242872	QM0000536
DDD01291375	QM0000537
DDD01243054	QM0000538
DDD01291383	QM0000539
DDD01243334	QM0000540
DDD01291389	QM0000541
DDD01243429	QM0000542
DDD01291397	QM0000543
LowControl	LowControl
HighControl	HighControl
DDD01049304	QM0000544
DDD01052395	QM0000545
DDD01049367	QM0000546
DDD01052402	QM0000547
DDD00717708	QM0000548
DDD01052406	QM0000549
DDD01049439	QM0000550
DDD01052414	QM0000551
DDD01049543	QM0000552
DDD01052422	QM0000553
DDD01049579	QM0000554
DDD01052428	QM0000555
DDD01049620	QM0000556
DDD01052436	QM0000557
DDD01049679	QM0000558
DDD01052443	QM0000559
DDD01049712	QM0000560
DDD00012927	QM0000561
DDD01049810	QM0000562
DDD01052453	QM0000563
DDD01049870	QM0000564
LowControl	LowControl
HighControl	HighControl
DDD00530491	QM0000565
DDD01242879	QM0000566
DDD00257209	QM0000567
DDD01242855	QM0000568
DDD01291340	QM0000569
DDD01242751	QM0000570
DDD01291346	QM0000571
DDD01242604	QM0000572
DDD01291354	QM0000573
DDD01242690	QM0000574
DDD01291361	QM0000575
DDD00091455	QM0000576
DDD01291368	QM0000577
DDD01242888	QM0000578
DDD01291376	QM0000579
DDD01243059	QM0000580
DDD01291384	QM0000581
DDD01243347	QM0000582
DDD01291390	QM0000583
DDD01291398	QM0000584
LowControl	LowControl
HighControl	HighControl
DDD01049305	QM0000585
DDD01052396	QM0000586
DDD00050641	QM0000587
DDD00018286	QM0000588
DDD01049412	QM0000589
DDD01052407	QM0000590
DDD01049440	QM0000591
DDD01052415	QM0000592
DDD01049548	QM0000593
DDD01052423	QM0000594
DDD01049580	QM0000595
DDD01052429	QM0000596
DDD01049621	QM0000597
DDD01052437	QM0000598
DDD01049683	QM0000599
DDD01052444	QM0000600
DDD01049713	QM0000601
DDD01052448	QM0000602
DDD01049822	QM0000603
DDD01052454	QM0000604
LowControl	LowControl
HighControl	HighControl
DDD00329707	QM0000605
DDD01242589	QM0000606
DDD00509118	QM0000607
DDD01242709	QM0000608
DDD01291341	QM0000609
DDD01243426	QM0000610
DDD01291347	QM0000611
DDD01242737	QM0000612
DDD01291355	QM0000613
DDD01242897	QM0000614
DDD01291362	QM0000615
DDD01243456	QM0000616
DDD01291369	QM0000617
DDD01242892	QM0000618
DDD01291377	QM0000619
DDD01243067	QM0000620
DDD01291385	QM0000621
DDD01243375	QM0000622
DDD01291391	QM0000623
DDD01291399	QM0000624
LowControl	LowControl
HighControl	HighControl
DDD01049318	QM0000625
DDD01052397	QM0000626
DDD01049373	QM0000627
DDD01052403	QM0000628
DDD01049413	QM0000629
DDD01052408	QM0000630
DDD01049471	QM0000631
DDD01052416	QM0000632
DDD01049551	QM0000633
DDD01052424	QM0000634
DDD01049584	QM0000635
DDD01052430	QM0000636
DDD00083497	QM0000637
DDD01052438	QM0000638
DDD01049685	QM0000639
DDD01052445	QM0000640
DDD01049729	QM0000641
DDD01052449	QM0000642
DDD01049825	QM0000643
DDD00013228	QM0000644
LowControl	LowControl
HighControl	HighControl
DDD00507297	QM0000645
DDD01243439	QM0000646
DDD01291334	QM0000647
DDD01242713	QM0000648
DDD01291342	QM0000649
DDD01242616	QM0000650
DDD01291348	QM0000651
DDD01242552	QM0000652
DDD01291356	QM0000653
DDD01242509	QM0000654
DDD00767179	QM0000655
DDD01243463	QM0000656
DDD01291370	QM0000657
DDD01242896	QM0000658
DDD01291378	QM0000659
DDD01243079	QM0000660
DDD01291386	QM0000661
DDD01243389	QM0000662
DDD01291392	QM0000663
LowControl	LowControl
HighControl	HighControl
DDD01049285	QM0000664
DDD01289775	QM0000665
DDD01049301	QM0000666
DDD01289779	QM0000667
DDD01049363	QM0000668
DDD01289780	QM0000669
DDD01049450	QM0000670
DDD01289786	QM0000671
DDD01049508	QM0000672
DDD01289790	QM0000673
DDD00083650	QM0000674
DDD01289797	QM0000675
DDD01049659	QM0000676
DDD01289804	QM0000677
DDD01049706	QM0000678
DDD01289811	QM0000679
DDD01049759	QM0000680
DDD01289819	QM0000681
DDD01049787	QM0000682
DDD01289827	QM0000683
DDD01049882	QM0000684
DDD01289832	QM0000685
LowControl	LowControl
HighControl	HighControl
DDD01289837	QM0000686
DDD01242664	QM0000687
DDD01289841	QM0000688
DDD01242512	QM0000689
DDD01289846	QM0000690
DDD01242581	QM0000691
DDD01289851	QM0000692
DDD01242891	QM0000693
DDD01289857	QM0000694
DDD01242967	QM0000695
DDD01289865	QM0000696
DDD01242912	QM0000697
DDD01289872	QM0000698
DDD00040945	QM0000699
DDD01289880	QM0000700
DDD01243199	QM0000701
DDD01289888	QM0000702
DDD01243367	QM0000703
DDD01289896	QM0000704
DDD01289904	QM0000705
LowControl	LowControl
HighControl	HighControl
DDD01049286	QM0000706
DDD01289776	QM0000707
DDD01049321	QM0000708
DDD00535044	QM0000709
DDD01049364	QM0000710
DDD01289781	QM0000711
DDD01049451	QM0000712
DDD00509638	QM0000713
DDD01049523	QM0000714
DDD00282919	QM0000715
DDD01049623	QM0000716
DDD01289798	QM0000717
DDD01049660	QM0000718
DDD01289805	QM0000719
DDD01049707	QM0000720
DDD01289812	QM0000721
DDD01049760	QM0000722
DDD01289820	QM0000723
DDD01049788	QM0000724
DDD01289828	QM0000725
DDD01049883	QM0000726
DDD01289833	QM0000727
LowControl	LowControl
HighControl	HighControl
DDD01289838	QM0000728
DDD01242601	QM0000729
DDD01289842	QM0000730
DDD01242607	QM0000731
DDD00080624	QM0000732
DDD01242517	QM0000733
DDD01289852	QM0000734
DDD01243126	QM0000735
DDD01289858	QM0000736
DDD01243047	QM0000737
DDD01289866	QM0000738
DDD01242919	QM0000739
DDD01289873	QM0000740
DDD00005273	QM0000741
DDD01289881	QM0000742
DDD01243209	QM0000743
DDD01289889	QM0000744
DDD01243374	QM0000745
DDD01289897	QM0000746
DDD01289905	QM0000747
LowControl	LowControl
HighControl	HighControl
DDD01049287	QM0000748
DDD00494861	QM0000749
DDD01049322	QM0000750
DDD00330618	QM0000751
DDD01049408	QM0000752
DDD01289782	QM0000753
DDD01049456	QM0000754
DDD01289787	QM0000755
DDD01049524	QM0000756
DDD01289791	QM0000757
DDD01049634	QM0000758
DDD00399081	QM0000759
DDD01049665	QM0000760
DDD01289806	QM0000761
DDD01049741	QM0000762
DDD01289813	QM0000763
DDD01049765	QM0000764
DDD01289821	QM0000765
DDD01049789	QM0000766
DDD00396900	QM0000767
DDD01049884	QM0000768
DDD00403047	QM0000769
LowControl	LowControl
HighControl	HighControl
DDD00512721	QM0000770
DDD01242848	QM0000771
DDD01289843	QM0000772
DDD01242781	QM0000773
DDD00292423	QM0000774
DDD01242717	QM0000775
DDD01289853	QM0000776
DDD01242673	QM0000777
DDD01289859	QM0000778
DDD01242803	QM0000779
DDD01289867	QM0000780
DDD00646499	QM0000781
DDD01289874	QM0000782
DDD01243093	QM0000783
DDD01289882	QM0000784
DDD01243214	QM0000785
DDD01289890	QM0000786
DDD01243397	QM0000787
DDD01289898	QM0000788
DDD01289906	QM0000789
LowControl	LowControl
HighControl	HighControl
DDD01049289	QM0000790
DDD01289777	QM0000791
DDD01049323	QM0000792
DDD00506147	QM0000793
DDD01049429	QM0000794
DDD01289783	QM0000795
DDD01049457	QM0000796
DDD00275291	QM0000797
DDD01049533	QM0000798
DDD01289792	QM0000799
DDD01049635	QM0000800
DDD01289799	QM0000801
DDD01049666	QM0000802
DDD01289807	QM0000803
DDD01049744	QM0000804
DDD01289814	QM0000805
DDD01049769	QM0000806
DDD01289822	QM0000807
DDD01049794	QM0000808
DDD00346586	QM0000809
DDD01049891	QM0000810
DDD01289834	QM0000811
LowControl	LowControl
HighControl	HighControl
DDD00501750	QM0000812
DDD01243013	QM0000813
DDD00705042	QM0000814
DDD01243210	QM0000815
DDD01289847	QM0000816
DDD01242808	QM0000817
DDD01289854	QM0000818
DDD01242745	QM0000819
DDD01289860	QM0000820
DDD01242814	QM0000821
DDD00402988	QM0000822
DDD01242960	QM0000823
DDD01289875	QM0000824
DDD01243164	QM0000825
DDD01289883	QM0000826
DDD00320127	QM0000827
DDD01289891	QM0000828
DDD01243410	QM0000829
DDD01289899	QM0000830
DDD01289907	QM0000831
LowControl	LowControl
HighControl	HighControl
DDD01049290	QM0000832
DDD00527168	QM0000833
DDD01049325	QM0000834
DDD00616693	QM0000835
DDD01049435	QM0000836
DDD01289784	QM0000837
DDD00083052	QM0000838
DDD00273961	QM0000839
DDD01049535	QM0000840
DDD01289793	QM0000841
DDD01049649	QM0000842
DDD01289800	QM0000843
DDD01049691	QM0000844
DDD01289808	QM0000845
DDD01049746	QM0000846
DDD01289815	QM0000847
DDD01049770	QM0000848
DDD01289823	QM0000849
DDD01049795	QM0000850
DDD01289829	QM0000851
DDD01289835	QM0000852
LowControl	LowControl
HighControl	HighControl
DDD00289822	QM0000853
DDD01242682	QM0000854
DDD01289844	QM0000855
DDD01242547	QM0000856
DDD01289848	QM0000857
DDD01242579	QM0000858
DDD01289855	QM0000859
DDD01242555	QM0000860
DDD01289861	QM0000861
DDD00004981	QM0000862
DDD01289868	QM0000863
DDD01242961	QM0000864
DDD01289876	QM0000865
DDD01243167	QM0000866
DDD01289884	QM0000867
DDD01243323	QM0000868
DDD01289892	QM0000869
DDD01243416	QM0000870
DDD01289900	QM0000871
DDD01289908	QM0000872
LowControl	LowControl
HighControl	HighControl
DDD01049291	QM0000873
DDD01289778	QM0000874
DDD01049347	QM0000875
DDD00330983	QM0000876
DDD01049436	QM0000877
DDD00763677	QM0000878
DDD01049470	QM0000879
DDD01289788	QM0000880
DDD01049536	QM0000881
DDD01289794	QM0000882
DDD01049650	QM0000883
DDD01289801	QM0000884
DDD01049692	QM0000885
DDD00404399	QM0000886
DDD01049747	QM0000887
DDD01289816	QM0000888
DDD01049777	QM0000889
DDD01289824	QM0000890
DDD01049826	QM0000891
DDD00507981	QM0000892
DDD01289836	QM0000893
LowControl	LowControl
HighControl	HighControl
DDD01289839	QM0000894
DDD01242870	QM0000895
DDD01289845	QM0000896
DDD01242707	QM0000897
DDD01289849	QM0000898
DDD01242620	QM0000899
DDD00273355	QM0000900
DDD01243446	QM0000901
DDD01289862	QM0000902
DDD01242890	QM0000903
DDD01289869	QM0000904
DDD01242969	QM0000905
DDD01289877	QM0000906
DDD01243168	QM0000907
DDD01289885	QM0000908
DDD01243324	QM0000909
DDD01289893	QM0000910
DDD01243437	QM0000911
DDD01289901	QM0000912
DDD01289909	QM0000913
LowControl	LowControl
HighControl	HighControl
DDD01049298	QM0000914
DDD00595359	QM0000915
DDD01049349	QM0000916
DDD00507229	QM0000917
DDD01049443	QM0000918
DDD00553533	QM0000919
DDD01049481	QM0000920
DDD00360701	QM0000921
DDD01049542	QM0000922
DDD01289795	QM0000923
DDD01049651	QM0000924
DDD01289802	QM0000925
DDD01049695	QM0000926
DDD01289809	QM0000927
DDD01049754	QM0000928
DDD01289817	QM0000929
DDD01049778	QM0000930
DDD01289825	QM0000931
DDD01049846	QM0000932
DDD01289830	QM0000933
LowControl	LowControl
HighControl	HighControl
DDD00534923	QM0000934
DDD01242878	QM0000935
DDD00095027	QM0000936
DDD01242564	QM0000937
DDD01289850	QM0000938
DDD01243103	QM0000939
DDD00280323	QM0000940
DDD01242936	QM0000941
DDD01289863	QM0000942
DDD00323190	QM0000943
DDD01289870	QM0000944
DDD01243035	QM0000945
DDD01289878	QM0000946
DDD01243192	QM0000947
DDD01289886	QM0000948
DDD01243325	QM0000949
DDD01289894	QM0000950
DDD01289902	QM0000951
DDD01289910	QM0000952
LowControl	LowControl
HighControl	HighControl
DDD01049299	QM0000953
DDD00342708	QM0000954
DDD01049350	QM0000955
DDD00507123	QM0000956
DDD01049449	QM0000957
DDD01289785	QM0000958
DDD01049482	QM0000959
DDD01289789	QM0000960
DDD01049599	QM0000961
DDD01289796	QM0000962
DDD01049658	QM0000963
DDD01289803	QM0000964
DDD01049705	QM0000965
DDD01289810	QM0000966
DDD01049755	QM0000967
DDD01289818	QM0000968
DDD01049785	QM0000969
DDD01289826	QM0000970
DDD01049847	QM0000971
DDD01289831	QM0000972
LowControl	LowControl
HighControl	HighControl
DDD01289840	QM0000973
DDD01242818	QM0000974
DDD00291678	QM0000975
DDD00077733	QM0000976
DDD00276193	QM0000977
DDD01242858	QM0000978
DDD01289856	QM0000979
DDD01243119	QM0000980
DDD01289864	QM0000981
DDD01242909	QM0000982
DDD01289871	QM0000983
DDD00022069	QM0000984
DDD01289879	QM0000985
DDD01243196	QM0000986
DDD01289887	QM0000987
DDD01243350	QM0000988
DDD01289895	QM0000989
DDD01289903	QM0000990
DDD01289911	QM0000991
LowControl	LowControl
HighControl	HighControl
DDD01295059	QM0000992
DDD01295067	QM0000993
DDD01292845	QM0000994
DDD01295075	QM0000995
DDD01292851	QM0000996
DDD01295083	QM0000997
DDD01292858	QM0000998
DDD01295091	QM0000999
DDD01292865	QM0001000
DDD01292873	QM0001001
DDD01292880	QM0001002
DDD01292888	QM0001003
DDD01292896	QM0001004
DDD01292904	QM0001005
DDD01292911	QM0001006
LowControl	LowControl
HighControl	HighControl
DDD01243143	QM0001007
DDD00525437	QM0001008
DDD01242625	QM0001009
DDD01292647	QM0001010
DDD01242775	QM0001011
DDD00277334	QM0001012
DDD01243460	QM0001013
DDD01292657	QM0001014
DDD01243127	QM0001015
DDD01292664	QM0001016
DDD01242497	QM0001017
DDD01292672	QM0001018
DDD01242985	QM0001019
DDD01292680	QM0001020
DDD01243219	QM0001021
DDD01292688	QM0001022
DDD01243282	QM0001023
DDD01292695	QM0001024
DDD01243359	QM0001025
DDD01292701	QM0001026
LowControl	LowControl
HighControl	HighControl
DDD01295060	QM0001027
DDD00518240	QM0001028
DDD01295068	QM0001029
DDD01292846	QM0001030
DDD01295076	QM0001031
DDD00679032	QM0001032
DDD01295084	QM0001033
DDD01292859	QM0001034
DDD01295092	QM0001035
DDD01292866	QM0001036
DDD01292874	QM0001037
DDD01292881	QM0001038
DDD01292889	QM0001039
DDD01292897	QM0001040
DDD00633865	QM0001041
DDD01292912	QM0001042
LowControl	LowControl
HighControl	HighControl
DDD01243435	QM0001043
DDD01292642	QM0001044
DDD01242687	QM0001045
DDD00023541	QM0001046
DDD01243132	QM0001047
DDD01292653	QM0001048
DDD01242793	QM0001049
DDD01292658	QM0001050
DDD01242659	QM0001051
DDD01292665	QM0001052
DDD01242729	QM0001053
DDD01292673	QM0001054
DDD00090051	QM0001055
DDD01292681	QM0001056
DDD01243221	QM0001057
DDD01292689	QM0001058
DDD01243285	QM0001059
DDD01292696	QM0001060
DDD01243363	QM0001061
DDD01292702	QM0001062
LowControl	LowControl
HighControl	HighControl
DDD01295061	QM0001063
DDD01292841	QM0001064
DDD01295069	QM0001065
DDD01292847	QM0001066
DDD01295077	QM0001067
DDD01292852	QM0001068
DDD01295085	QM0001069
DDD01292860	QM0001070
DDD01295093	QM0001071
DDD01292867	QM0001072
DDD01292875	QM0001073
DDD01292882	QM0001074
DDD01292890	QM0001075
DDD01292898	QM0001076
DDD01292905	QM0001077
DDD01292913	QM0001078
LowControl	LowControl
HighControl	HighControl
DDD01292639	QM0001079
DDD01242568	QM0001080
DDD01292643	QM0001081
DDD01243085	QM0001082
DDD01292648	QM0001083
DDD01243160	QM0001084
DDD00369918	QM0001085
DDD01242873	QM0001086
DDD00417336	QM0001087
DDD01242543	QM0001088
DDD01292666	QM0001089
DDD01242777	QM0001090
DDD01292674	QM0001091
DDD00486933	QM0001092
DDD01292682	QM0001093
DDD01243224	QM0001094
DDD01292690	QM0001095
DDD01243286	QM0001096
DDD01292697	QM0001097
DDD01243369	QM0001098
DDD01292703	QM0001099
LowControl	LowControl
HighControl	HighControl
DDD01295062	QM0001100
DDD01292842	QM0001101
DDD01295070	QM0001102
DDD00765823	QM0001103
DDD01295078	QM0001104
DDD01292853	QM0001105
DDD01295086	QM0001106
DDD00395512	QM0001107
DDD01295094	QM0001108
DDD01292868	QM0001109
DDD01292876	QM0001110
DDD01292883	QM0001111
DDD01292891	QM0001112
DDD01292899	QM0001113
DDD01292906	QM0001114
DDD01292914	QM0001115
LowControl	LowControl
HighControl	HighControl
DDD01242756	QM0001116
DDD01292644	QM0001117
DDD01243268	QM0001118
DDD00244166	QM0001119
DDD01242499	QM0001120
DDD01292654	QM0001121
DDD01243084	QM0001122
DDD01292659	QM0001123
DDD01243473	QM0001124
DDD01292667	QM0001125
DDD01242784	QM0001126
DDD01292675	QM0001127
DDD00487100	QM0001128
DDD01292683	QM0001129
DDD01243233	QM0001130
DDD01292691	QM0001131
DDD01243295	QM0001132
DDD00517400	QM0001133
DDD01243372	QM0001134
DDD01292704	QM0001135
LowControl	LowControl
HighControl	HighControl
DDD01295063	QM0001136
DDD00529485	QM0001137
DDD01295071	QM0001138
DDD01292848	QM0001139
DDD01295079	QM0001140
DDD01292854	QM0001141
DDD01295087	QM0001142
DDD01292861	QM0001143
DDD01292869	QM0001144
DDD00413955	QM0001145
DDD01292884	QM0001146
DDD01292892	QM0001147
DDD01292900	QM0001148
DDD01292907	QM0001149
DDD01292915	QM0001150
LowControl	LowControl
HighControl	HighControl
DDD00369206	QM0001151
DDD01242732	QM0001152
DDD00536572	QM0001153
DDD01242545	QM0001154
DDD01292649	QM0001155
DDD01242984	QM0001156
DDD01292655	QM0001157
DDD01242554	QM0001158
DDD01292660	QM0001159
DDD01242945	QM0001160
DDD01292668	QM0001161
DDD01242802	QM0001162
DDD01292676	QM0001163
DDD01243185	QM0001164
DDD01292684	QM0001165
DDD01243244	QM0001166
DDD01292692	QM0001167
DDD01243317	QM0001168
DDD01292698	QM0001169
DDD01243385	QM0001170
DDD01292705	QM0001171
LowControl	LowControl
HighControl	HighControl
DDD01295064	QM0001172
DDD01292843	QM0001173
DDD01295072	QM0001174
DDD00660894	QM0001175
DDD01295080	QM0001176
DDD01292855	QM0001177
DDD01295088	QM0001178
DDD01292862	QM0001179
DDD01292870	QM0001180
DDD01292877	QM0001181
DDD01292885	QM0001182
DDD01292893	QM0001183
DDD01292901	QM0001184
DDD01292908	QM0001185
DDD01292916	QM0001186
LowControl	LowControl
HighControl	HighControl
DDD00520180	QM0001187
DDD01242790	QM0001188
DDD00386816	QM0001189
DDD01242514	QM0001190
DDD01292650	QM0001191
DDD01242864	QM0001192
DDD00368553	QM0001193
DDD01242731	QM0001194
DDD01292661	QM0001195
DDD01242515	QM0001196
DDD01292669	QM0001197
DDD01242806	QM0001198
DDD01292677	QM0001199
DDD01243198	QM0001200
DDD01292685	QM0001201
DDD01243245	QM0001202
DDD00993844	QM0001203
DDD01243328	QM0001204
DDD01292699	QM0001205
DDD01243391	QM0001206
DDD01292706	QM0001207
LowControl	LowControl
HighControl	HighControl
DDD01295065	QM0001208
DDD00506883	QM0001209
DDD01295073	QM0001210
DDD01292849	QM0001211
DDD01295081	QM0001212
DDD01292856	QM0001213
DDD01295089	QM0001214
DDD01292863	QM0001215
DDD01292871	QM0001216
DDD01292878	QM0001217
DDD01292886	QM0001218
DDD01292894	QM0001219
DDD01292902	QM0001220
DDD01292909	QM0001221
DDD01292917	QM0001222
LowControl	LowControl
HighControl	HighControl
DDD01292641	QM0001223
DDD01242733	QM0001224
DDD01292645	QM0001225
DDD01242800	QM0001226
DDD01292651	QM0001227
DDD00175284	QM0001228
DDD01292656	QM0001229
DDD01242585	QM0001230
DDD01292662	QM0001231
DDD01242619	QM0001232
DDD01292670	QM0001233
DDD01242810	QM0001234
DDD01292678	QM0001235
DDD01243211	QM0001236
DDD01292686	QM0001237
DDD01243250	QM0001238
DDD01292693	QM0001239
DDD01243343	QM0001240
DDD01292700	QM0001241
DDD01243393	QM0001242
DDD01292707	QM0001243
LowControl	LowControl
HighControl	HighControl
DDD01295066	QM0001244
DDD01292844	QM0001245
DDD01295074	QM0001246
DDD01292850	QM0001247
DDD01295082	QM0001248
DDD01292857	QM0001249
DDD01295090	QM0001250
DDD01292864	QM0001251
DDD01292872	QM0001252
DDD01292879	QM0001253
DDD01292887	QM0001254
DDD01292895	QM0001255
DDD01292903	QM0001256
DDD01292910	QM0001257
DDD01292918	QM0001258
LowControl	LowControl
HighControl	HighControl
DDD00494549	QM0001259
DDD01243462	QM0001260
DDD01292646	QM0001261
DDD01242527	QM0001262
DDD01292652	QM0001263
DDD01243057	QM0001264
DDD00388242	QM0001265
DDD01243459	QM0001266
DDD01292663	QM0001267
DDD01243137	QM0001268
DDD01292671	QM0001269
DDD01242813	QM0001270
DDD01292679	QM0001271
DDD01243215	QM0001272
DDD01292687	QM0001273
DDD01243260	QM0001274
DDD01292694	QM0001275
DDD01243346	QM0001276
DDD00385903	QM0001277
DDD01292708	QM0001278
LowControl	LowControl
HighControl	HighControl
DDD01292269	QM0001279
DDD01292277	QM0001280
DDD01041874	QM0001281
DDD00665893	QM0001282
DDD01041878	QM0001283
DDD01292286	QM0001284
DDD01041885	QM0001285
DDD01292292	QM0001286
DDD01041893	QM0001287
DDD01292299	QM0001288
DDD01041900	QM0001289
DDD01292306	QM0001290
DDD01041906	QM0001291
DDD01292314	QM0001292
DDD00047063	QM0001293
DDD01292322	QM0001294
DDD01041915	QM0001295
DDD01292330	QM0001296
DDD01041919	QM0001297
DDD01292337	QM0001298
LowControl	LowControl
HighControl	HighControl
DDD01292343	QM0001299
DDD01242746	QM0001300
DDD01292349	QM0001301
DDD01242500	QM0001302
DDD01292352	QM0001303
DDD01242582	QM0001304
DDD01292357	QM0001305
DDD01242750	QM0001306
DDD01292364	QM0001307
DDD01242708	QM0001308
DDD01292371	QM0001309
DDD01242588	QM0001310
DDD01292379	QM0001311
DDD00091034	QM0001312
DDD01292387	QM0001313
DDD01243189	QM0001314
DDD01292395	QM0001315
DDD01243242	QM0001316
DDD01292403	QM0001317
DDD01243386	QM0001318
DDD01292411	QM0001319
LowControl	LowControl
HighControl	HighControl
DDD01041867	QM0001320
DDD01292278	QM0001321
DDD01041875	QM0001322
DDD00764715	QM0001323
DDD01041879	QM0001324
DDD00282978	QM0001325
DDD01041886	QM0001326
DDD01292293	QM0001327
DDD01041894	QM0001328
DDD01292300	QM0001329
DDD01041901	QM0001330
DDD01292307	QM0001331
DDD01041907	QM0001332
DDD01292315	QM0001333
DDD01292323	QM0001334
DDD00053462	QM0001335
DDD00338338	QM0001336
DDD01041920	QM0001337
DDD01292338	QM0001338
DDD01041928	QM0001339
LowControl	LowControl
HighControl	HighControl
DDD01292344	QM0001340
DDD01242725	QM0001341
DDD01292350	QM0001342
DDD01243009	QM0001343
DDD00763449	QM0001344
DDD01242508	QM0001345
DDD01292358	QM0001346
DDD01242523	QM0001347
DDD01292365	QM0001348
DDD01242926	QM0001349
DDD01292372	QM0001350
DDD01242706	QM0001351
DDD01292380	QM0001352
DDD01242988	QM0001353
DDD01292388	QM0001354
DDD01243204	QM0001355
DDD01292396	QM0001356
DDD01243243	QM0001357
DDD01292404	QM0001358
DDD01243390	QM0001359
DDD00052687	QM0001360
LowControl	LowControl
HighControl	HighControl
DDD01292271	QM0001361
DDD01041868	QM0001362
DDD01292279	QM0001363
DDD00038956	QM0001364
DDD00764802	QM0001365
DDD01041880	QM0001366
DDD00284342	QM0001367
DDD01041887	QM0001368
DDD01292294	QM0001369
DDD01041895	QM0001370
DDD01292301	QM0001371
DDD00008179	QM0001372
DDD01292308	QM0001373
DDD01041908	QM0001374
DDD01292316	QM0001375
DDD01041911	QM0001376
DDD01292324	QM0001377
DDD01041916	QM0001378
DDD01292331	QM0001379
DDD01041921	QM0001380
DDD01292339	QM0001381
DDD01041929	QM0001382
LowControl	LowControl
HighControl	HighControl
DDD00595399	QM0001383
DDD01242768	QM0001384
DDD00332185	QM0001385
DDD01242624	QM0001386
DDD01292353	QM0001387
DDD01243158	QM0001388
DDD01292359	QM0001389
DDD01243075	QM0001390
DDD01292366	QM0001391
DDD01242739	QM0001392
DDD01292373	QM0001393
DDD01242811	QM0001394
DDD01292381	QM0001395
DDD01243076	QM0001396
DDD01292389	QM0001397
DDD01243218	QM0001398
DDD01292397	QM0001399
DDD01243246	QM0001400
DDD01292405	QM0001401
DDD01243401	QM0001402
DDD01292412	QM0001403
LowControl	LowControl
HighControl	HighControl
DDD01292272	QM0001404
DDD01041869	QM0001405
DDD00760510	QM0001406
DDD00714404	QM0001407
DDD01292281	QM0001408
DDD01041881	QM0001409
DDD01292287	QM0001410
DDD01041888	QM0001411
DDD00105986	QM0001412
DDD01041896	QM0001413
DDD01292302	QM0001414
DDD01041902	QM0001415
DDD01292309	QM0001416
DDD00711677	QM0001417
DDD01292317	QM0001418
DDD01292325	QM0001419
DDD01041917	QM0001420
DDD01292332	QM0001421
DDD01041922	QM0001422
DDD01292340	QM0001423
DDD01041930	QM0001424
LowControl	LowControl
HighControl	HighControl
DDD01292345	QM0001425
DDD01243011	QM0001426
DDD00375131	QM0001427
DDD01243149	QM0001428
DDD01292354	QM0001429
DDD01243448	QM0001430
DDD01292360	QM0001431
DDD01242753	QM0001432
DDD01292367	QM0001433
DDD01242860	QM0001434
DDD01292374	QM0001435
DDD01242812	QM0001436
DDD01292382	QM0001437
DDD00041887	QM0001438
DDD01292390	QM0001439
DDD01243231	QM0001440
DDD01292398	QM0001441
DDD01243248	QM0001442
DDD01292406	QM0001443
DDD01243403	QM0001444
DDD01292413	QM0001445
LowControl	LowControl
HighControl	HighControl
DDD01292273	QM0001446
DDD01041870	QM0001447
DDD00545915	QM0001448
DDD00320854	QM0001449
DDD01292282	QM0001450
DDD01041882	QM0001451
DDD01292288	QM0001452
DDD01041889	QM0001453
DDD01292295	QM0001454
DDD01041897	QM0001455
DDD01292303	QM0001456
DDD01041903	QM0001457
DDD01292310	QM0001458
DDD00076191	QM0001459
DDD01292318	QM0001460
DDD00711875	QM0001461
DDD01292326	QM0001462
DDD00310781	QM0001463
DDD01292333	QM0001464
DDD01041923	QM0001465
DDD01292341	QM0001466
DDD01041931	QM0001467
LowControl	LowControl
HighControl	HighControl
DDD00502614	QM0001468
DDD01243455	QM0001469
DDD00374876	QM0001470
DDD00853959	QM0001471
DDD00018944	QM0001472
DDD01242537	QM0001473
DDD01292361	QM0001474
DDD01242692	QM0001475
DDD01292368	QM0001476
DDD01242662	QM0001477
DDD01292375	QM0001478
DDD01242874	QM0001479
DDD01292383	QM0001480
DDD01243081	QM0001481
DDD01292391	QM0001482
DDD01243232	QM0001483
DDD01292399	QM0001484
DDD01243338	QM0001485
DDD01292407	QM0001486
DDD01292414	QM0001487
LowControl	LowControl
HighControl	HighControl
DDD01292274	QM0001488
DDD01041871	QM0001489
DDD00508686	QM0001490
DDD01041876	QM0001491
DDD01292283	QM0001492
DDD01041883	QM0001493
DDD01292289	QM0001494
DDD01041890	QM0001495
DDD01292296	QM0001496
DDD01041898	QM0001497
DDD01292304	QM0001498
DDD01041904	QM0001499
DDD01292311	QM0001500
DDD00711879	QM0001501
DDD01292319	QM0001502
DDD00306002	QM0001503
DDD01292327	QM0001504
DDD00023361	QM0001505
DDD01292334	QM0001506
DDD01041924	QM0001507
DDD01292342	QM0001508
LowControl	LowControl
HighControl	HighControl
DDD01292346	QM0001509
DDD01242701	QM0001510
DDD01292351	QM0001511
DDD01243451	QM0001512
DDD01292355	QM0001513
DDD01242782	QM0001514
DDD01292362	QM0001515
DDD01243115	QM0001516
DDD01292369	QM0001517
DDD01243104	QM0001518
DDD01292376	QM0001519
DDD01242887	QM0001520
DDD01292384	QM0001521
DDD01243095	QM0001522
DDD01292392	QM0001523
DDD01243237	QM0001524
DDD01292400	QM0001525
DDD01243354	QM0001526
DDD01292408	QM0001527
DDD01292415	QM0001528
LowControl	LowControl
HighControl	HighControl
DDD01292275	QM0001529
DDD01041872	QM0001530
DDD00508432	QM0001531
DDD00008487	QM0001532
DDD01292284	QM0001533
DDD00754647	QM0001534
DDD01292290	QM0001535
DDD01041891	QM0001536
DDD01292297	QM0001537
DDD00038384	QM0001538
DDD00412510	QM0001539
DDD01041905	QM0001540
DDD01292312	QM0001541
DDD01041909	QM0001542
DDD01292320	QM0001543
DDD01041913	QM0001544
DDD01292328	QM0001545
DDD01041918	QM0001546
DDD01292335	QM0001547
DDD01041925	QM0001548
DDD00336990	QM0001549
DDD00494389	QM0001550
LowControl	LowControl
HighControl	HighControl
DDD01292347	QM0001551
DDD01242720	QM0001552
DDD00550959	QM0001553
DDD01243157	QM0001554
DDD01292356	QM0001555
DDD01242651	QM0001556
DDD01292363	QM0001557
DDD01242686	QM0001558
DDD01292370	QM0001559
DDD01242691	QM0001560
DDD01292377	QM0001561
DDD01242931	QM0001562
DDD01292385	QM0001563
DDD01243169	QM0001564
DDD01292393	QM0001565
DDD01243238	QM0001566
DDD01292401	QM0001567
DDD01243380	QM0001568
DDD01292409	QM0001569
LowControl	LowControl
HighControl	HighControl
DDD01292276	QM0001570
DDD01041873	QM0001571
DDD01292280	QM0001572
DDD01041877	QM0001573
DDD01292285	QM0001574
DDD01041884	QM0001575
DDD01292291	QM0001576
DDD01041892	QM0001577
DDD01292298	QM0001578
DDD01041899	QM0001579
DDD01292305	QM0001580
DDD00306021	QM0001581
DDD01292313	QM0001582
DDD00042524	QM0001583
DDD01292321	QM0001584
DDD01041914	QM0001585
DDD01292329	QM0001586
DDD00036034	QM0001587
DDD01292336	QM0001588
LowControl	LowControl
HighControl	HighControl
DDD01292348	QM0001589
DDD01242992	QM0001590
DDD00246141	QM0001591
DDD01243465	QM0001592
DDD00511103	QM0001593
DDD01242614	QM0001594
DDD00499739	QM0001595
DDD01242946	QM0001596
DDD00396386	QM0001597
DDD01242618	QM0001598
DDD01292378	QM0001599
DDD01242949	QM0001600
DDD01292386	QM0001601
DDD01243175	QM0001602
DDD01292394	QM0001603
DDD01243241	QM0001604
DDD01292402	QM0001605
DDD01243381	QM0001606
DDD01292410	QM0001607
LowControl	LowControl
HighControl	HighControl
DDD01292491	QM0001608
DDD01052531	QM0001609
DDD01292499	QM0001610
DDD01052538	QM0001611
DDD00765100	QM0001612
DDD01052545	QM0001613
DDD01292508	QM0001614
DDD01052552	QM0001615
DDD01292514	QM0001616
DDD01052559	QM0001617
DDD01292520	QM0001618
DDD01052566	QM0001619
DDD01292527	QM0001620
DDD01052572	QM0001621
DDD01292533	QM0001622
DDD01052580	QM0001623
DDD01292541	QM0001624
DDD01052587	QM0001625
DDD01292549	QM0001626
DDD01052595	QM0001627
DDD01292557	QM0001628
DDD01052603	QM0001629
LowControl	LowControl
HighControl	HighControl
DDD01292564	QM0001630
DDD01049306	QM0001631
DDD00544392	QM0001632
DDD01049331	QM0001633
DDD01292574	QM0001634
DDD01049378	QM0001635
DDD01292579	QM0001636
DDD00082915	QM0001637
DDD01292586	QM0001638
DDD01049511	QM0001639
DDD01292593	QM0001640
DDD01049550	QM0001641
DDD01292601	QM0001642
DDD00083641	QM0001643
DDD01292609	QM0001644
DDD00304144	QM0001645
DDD01292617	QM0001646
DDD01049734	QM0001647
DDD01292622	QM0001648
DDD01049804	QM0001649
DDD01292630	QM0001650
DDD01049859	QM0001651
LowControl	LowControl
HighControl	HighControl
DDD01292492	QM0001652
DDD01052532	QM0001653
DDD01292500	QM0001654
DDD01052539	QM0001655
DDD01292505	QM0001656
DDD01052546	QM0001657
DDD01292509	QM0001658
DDD01052553	QM0001659
DDD01292515	QM0001660
DDD01052560	QM0001661
DDD01292521	QM0001662
DDD01052567	QM0001663
DDD01292528	QM0001664
DDD01052573	QM0001665
DDD01292534	QM0001666
DDD01052581	QM0001667
DDD01292542	QM0001668
DDD01052588	QM0001669
DDD01292550	QM0001670
DDD01052596	QM0001671
DDD01292558	QM0001672
LowControl	LowControl
HighControl	HighControl
DDD01049307	QM0001673
DDD00542852	QM0001674
DDD01049335	QM0001675
DDD01292575	QM0001676
DDD01049390	QM0001677
DDD01292580	QM0001678
DDD01049487	QM0001679
DDD01292587	QM0001680
DDD01049513	QM0001681
DDD01292594	QM0001682
DDD01049556	QM0001683
DDD01292602	QM0001684
DDD01049613	QM0001685
DDD01292610	QM0001686
DDD00709480	QM0001687
DDD01292618	QM0001688
DDD01049762	QM0001689
DDD01292623	QM0001690
DDD01049811	QM0001691
DDD01292631	QM0001692
DDD01049871	QM0001693
LowControl	LowControl
HighControl	HighControl
DDD01292493	QM0001694
DDD00048955	QM0001695
DDD01292501	QM0001696
DDD01052540	QM0001697
DDD00254145	QM0001698
DDD01052547	QM0001699
DDD01292510	QM0001700
DDD01052554	QM0001701
DDD01292516	QM0001702
DDD01052561	QM0001703
DDD01292522	QM0001704
DDD00050631	QM0001705
DDD01292529	QM0001706
DDD01052574	QM0001707
DDD01292535	QM0001708
DDD01052582	QM0001709
DDD01292543	QM0001710
DDD01052589	QM0001711
DDD01292551	QM0001712
DDD01052597	QM0001713
DDD00543506	QM0001714
LowControl	LowControl
HighControl	HighControl
DDD01049308	QM0001715
DDD01292569	QM0001716
DDD01049346	QM0001717
DDD00381564	QM0001718
DDD01049391	QM0001719
DDD01292581	QM0001720
DDD01049488	QM0001721
DDD01292588	QM0001722
DDD01049514	QM0001723
DDD01292595	QM0001724
DDD01049557	QM0001725
DDD01292603	QM0001726
DDD01049614	QM0001727
DDD01292611	QM0001728
DDD00709509	QM0001729
DDD01292619	QM0001730
DDD01049771	QM0001731
DDD01292624	QM0001732
DDD01049813	QM0001733
DDD01292632	QM0001734
DDD01049885	QM0001735
LowControl	LowControl
HighControl	HighControl
DDD01292494	QM0001736
DDD01052533	QM0001737
DDD01292502	QM0001738
DDD01052541	QM0001739
DDD01292506	QM0001740
DDD01052548	QM0001741
DDD00378362	QM0001742
DDD01052555	QM0001743
DDD01292517	QM0001744
DDD01052562	QM0001745
DDD01292523	QM0001746
DDD01052568	QM0001747
DDD01292530	QM0001748
DDD01052575	QM0001749
DDD01292536	QM0001750
DDD01052583	QM0001751
DDD01292544	QM0001752
DDD01052590	QM0001753
DDD01292552	QM0001754
DDD01052598	QM0001755
DDD01292559	QM0001756
LowControl	LowControl
HighControl	HighControl
DDD00315399	QM0001757
DDD01049309	QM0001758
DDD01292570	QM0001759
DDD01049355	QM0001760
DDD00279917	QM0001761
DDD01049393	QM0001762
DDD01292582	QM0001763
DDD01049489	QM0001764
DDD01292589	QM0001765
DDD01049522	QM0001766
DDD01292596	QM0001767
DDD01049589	QM0001768
DDD01292604	QM0001769
DDD01049615	QM0001770
DDD01292612	QM0001771
DDD01049648	QM0001772
DDD01292620	QM0001773
DDD01049772	QM0001774
DDD01292625	QM0001775
DDD01049814	QM0001776
DDD01292633	QM0001777
DDD01049887	QM0001778
LowControl	LowControl
HighControl	HighControl
DDD01292495	QM0001779
DDD01052534	QM0001780
DDD00334195	QM0001781
DDD00008902	QM0001782
DDD00248239	QM0001783
DDD01052549	QM0001784
DDD01292511	QM0001785
DDD00011974	QM0001786
DDD00418638	QM0001787
DDD01052563	QM0001788
DDD00409804	QM0001789
DDD01052569	QM0001790
DDD00406438	QM0001791
DDD01052576	QM0001792
DDD01292537	QM0001793
DDD01052584	QM0001794
DDD01292545	QM0001795
DDD01052591	QM0001796
DDD01292553	QM0001797
DDD01052599	QM0001798
DDD01292560	QM0001799
LowControl	LowControl
HighControl	HighControl
DDD01292567	QM0001800
DDD01049310	QM0001801
DDD01292571	QM0001802
DDD01049357	QM0001803
DDD01292576	QM0001804
DDD01049395	QM0001805
DDD01292583	QM0001806
DDD01049500	QM0001807
DDD00404297	QM0001808
DDD00039895	QM0001809
DDD01292597	QM0001810
DDD01049590	QM0001811
DDD01292605	QM0001812
DDD00097614	QM0001813
DDD01292613	QM0001814
DDD01049653	QM0001815
DDD01292621	QM0001816
DDD01049773	QM0001817
DDD01292626	QM0001818
DDD01049815	QM0001819
DDD01292634	QM0001820
DDD01049890	QM0001821
LowControl	LowControl
HighControl	HighControl
[truncated: 8,219 more rows]
